# Supplementary material
Source: HighWire-hosted journal article supplement (https://www.jrheum.org/highwire/filestream/29741/field_highwire_adjunct_files/0/150479_Data_Suppl.pdf)
Supplement: 150479_Data_Suppl.pdf [file 150479_Data_Suppl.pdf]

**Supplemental Figure 1a and b.** Study periods for incident (a) and prevalent (b) patients with granulomatosis with polyangiitis (GPA).

(a)

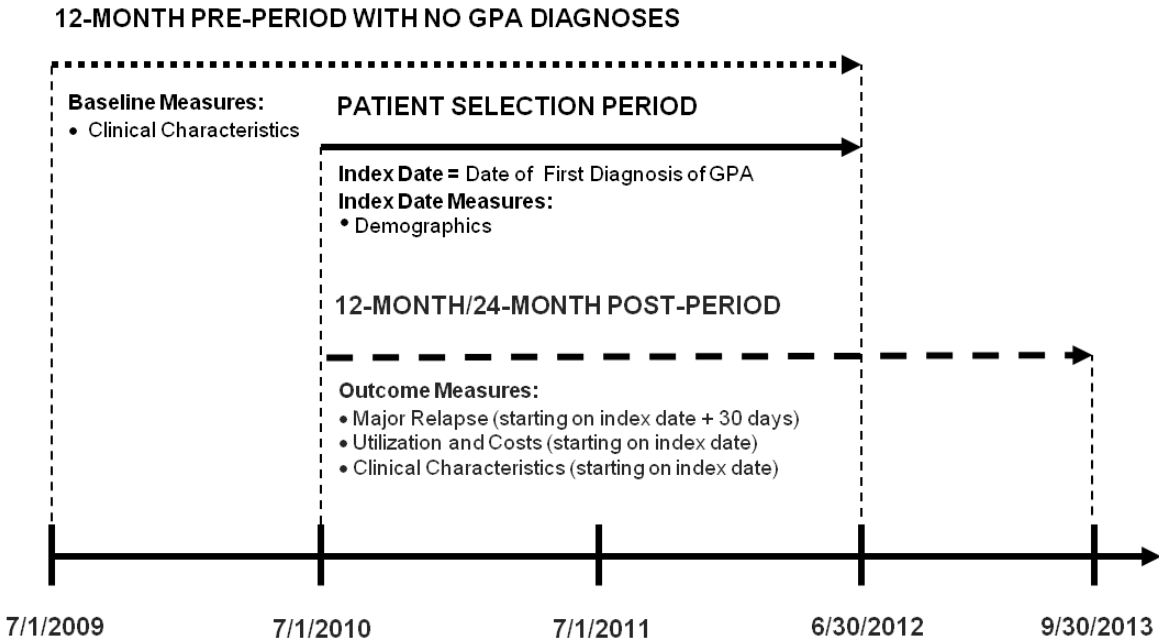

(b)

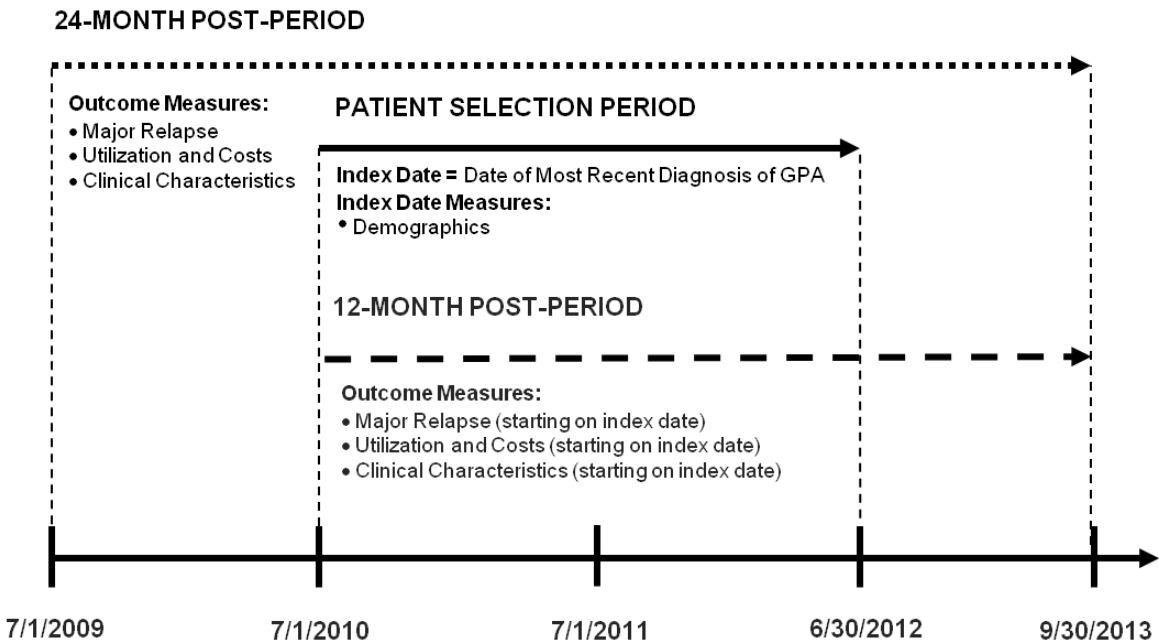

**Supplemental Table 1.** Clinical characteristics of patients with GPA over 24-month followup.

|                                                                               | 24-Month Followup        |                           |                              |
|-------------------------------------------------------------------------------|--------------------------|---------------------------|------------------------------|
|                                                                               | Total GPA<br>(N = 1,926) | Incident GPA<br>(N = 309) | Prevalent GPA<br>(N = 1,617) |
| <b>Mean (SD) Deyo Charlson Comorbidity Index*</b>                             | 2.0 (2.1)                | 2.0 (2.0)                 | 2.0 (2.2)                    |
| <b>Diagnoses of Major Relapse-Associated Conditions based on BVAS*, N (%)</b> |                          |                           |                              |
| Acute/chronic renal failure                                                   | 652 (33.9)               | 107 (34.6)                | 545 (33.7)                   |
| Gangrene                                                                      | 8 (0.4)                  | 3 (1.0)                   | 5 (0.3)                      |
| Scleritis                                                                     | 62 (3.2)                 | 9 (2.9)                   | 53 (3.3)                     |
| Retinal exudates/hemorrhage                                                   | 0 (0.0)                  | 0 (0.0)                   | 0 (0.0)                      |
| Sensorineural deafness                                                        | 202 (10.5)               | 33 (10.7)                 | 169 (10.5)                   |
| Mesenteric ischemia                                                           | 8 (0.4)                  | 2 (0.6)                   | 6 (0.4)                      |
| Lung-related condition                                                        | 219 (11.0)               | 43 (14.0)                 | 176 (11.0)                   |
| Hemoptysis                                                                    | 94 (4.9)                 | 26 (8.4)                  | 68 (4.2)                     |
| Respiratory failure                                                           | 160 (8.3)                | 27 (8.7)                  | 133 (8.2)                    |
| Meningitis                                                                    | 7 (0.4)                  | 1 (0.3)                   | 6 (0.4)                      |
| Cord lesion                                                                   | 8 (0.4)                  | 3 (1.0)                   | 5 (0.3)                      |
| Stroke                                                                        | 49 (2.5)                 | 6 (1.9)                   | 43 (2.7)                     |
| Cranial nerve palsy                                                           | 10 (0.5)                 | 3 (1.0)                   | 7 (0.4)                      |
| Sensory peripheral neuropathy                                                 | 131 (6.8)                | 19 (6.1)                  | 112 (6.9)                    |
| Motor mononeuritis multiplex                                                  | 20 (1.0)                 | 4 (1.3)                   | 16 (1.0)                     |
| <b>Relapse during the post-index period</b>                                   |                          |                           |                              |
| Presence of relapse, N (%)                                                    | 576 (29.9)               | 82 (26.5)                 | 494 (30.6)                   |
| 1 Relapse                                                                     | 344 (17.9)               | 51 (16.5)                 | 293 (18.1)                   |

|                                                                                   |           |           |            |
|-----------------------------------------------------------------------------------|-----------|-----------|------------|
| 2-3 Relapses                                                                      | 188 (9.8) | 25 (8.1)  | 163 (10.1) |
| >3 Relapses                                                                       | 44 (2.3)  | 6 (1.9)   | 38 (2.4)   |
| Mean (SD) number of relapses per patient among patients with at least one relapse | 1.7 (1.2) | 1.7 (1.2) | 1.8 (1.2)  |

BVAS: Birmingham Vasculitis Activity Scale; GPA: granulomatosis with polyangiitis.

\* Patients with hemoptysis (ICD-9-CM 786.30, 786.39) were gathered because no diagnosis codes were available for alveolar hemorrhage.

**Supplemental Table 2.** All-cause and GPA-related healthcare costs of patients with granulomatosis with polyangiitis (GPA). All costs in US\$.

|                                | Healthcare Costs       |                                |                         |                              |
|--------------------------------|------------------------|--------------------------------|-------------------------|------------------------------|
|                                | 12-Month Follow-Up     |                                | 24-Month Follow-Up      |                              |
|                                | Mean (SD)              | Median (Min-Max)               | Mean (SD)               | Median (Min-Max)             |
|                                | All-cause              |                                |                         |                              |
| Inpatient admission costs      | \$11,876<br>(\$39,668) | \$0 (\$0-\$738,495)            | \$23,517<br>(\$76,821)  | \$0 (\$0-\$1,625,085)        |
| Emergency room costs           | \$459<br>(\$1,576)     | \$0 (\$0-\$33,755)             | \$844 (\$2,544)         | \$0 (\$0-\$62,043)           |
| Outpatient office visit costs  | \$1,549<br>(\$1,260)   | \$1,243 (\$0-\$21,434)         | \$3,063<br>(\$2,452)    | \$2,537 (\$0-\$38,506)       |
| Other outpatient service costs | \$23,158<br>(\$66,542) | \$5,864<br>(\$0-\$987,423)     | \$40,661<br>(\$111,181) | \$13,835 (\$0-\$1,765,932)   |
| Prescription drug costs        | \$4,357<br>(\$7,820)   | \$2,160<br>(\$0-\$155,178)     | \$8,713<br>(\$13,603)   | \$4,699 (\$0-\$179,974)      |
| Total costs                    | \$41,400<br>(\$87,537) | \$13,934<br>(\$94-\$1,023,075) | \$76,798<br>(\$152,863) | \$33,545 (\$111-\$1,954,908) |
|                                | GPA-related            |                                |                         |                              |
| Inpatient admission costs      | \$10,149<br>(\$36,013) | \$0 (\$0-\$737,576)            | \$20,292<br>(\$72,729)  | \$0 (\$0-\$1,570,062)        |
| Emergency room costs           | \$47 (\$265)           | \$0 (\$0-\$4,506)              | \$86 (\$419)            | \$0 (\$0-\$6,929)            |
| Outpatient office visit costs  | \$537 (\$573)          | \$378 (\$0-\$6,463)            | \$1,046<br>(\$1,377)    | \$774 (\$0-\$38,178)         |
| Other outpatient service costs | \$12,950<br>(\$59,392) | \$478 (\$0-\$958,830)          | \$21,942<br>(\$98,224)  | \$1,280 (\$0-\$1,707,618)    |

|                         |                        |                         |                         |                           |
|-------------------------|------------------------|-------------------------|-------------------------|---------------------------|
| Prescription drug costs | \$637<br>(\$3,047)     | \$107 (\$0-\$74,151)    | \$1,374<br>(\$5,749)    | \$279 (\$0-\$105,308)     |
| Total costs             | \$24,319<br>(\$74,362) | \$2,058 (\$0-\$948,081) | \$44,740<br>(\$129,973) | \$7,451 (\$0-\$1,734,922) |

**Supplemental Table 3.** All-cause and GPA-related healthcare costs by major relapse status in patients with granulomatosis with polyangiitis (GPA). All costs in US\$.

| <b>Healthcare Costs</b> |                          |                                   |                         |                                 |
|-------------------------|--------------------------|-----------------------------------|-------------------------|---------------------------------|
|                         | <b>With Relapse</b>      |                                   | <b>Without Relapse</b>  |                                 |
|                         | <b>Mean (SD)</b>         | <b>Median (Min-Max)</b>           | <b>Mean (SD)</b>        | <b>Median (Min-Max)</b>         |
| 12-month Followup       |                          |                                   |                         |                                 |
| All-cause Total costs   | \$88,065<br>(\$131,314)  | \$43,057<br>(\$263-\$1,023,075)   | \$30,682<br>(\$69,667)  | \$10,799<br>(\$94-\$950,225)    |
| GPA-related Total costs | \$61,636<br>(\$116,528)  | \$23,489<br>(\$4-\$984,081)       | \$15,748<br>(\$57,382)  | \$1,438<br>(\$0-\$948,075)      |
| 24-month Followup       |                          |                                   |                         |                                 |
| All-cause Total costs   | \$136,007<br>(\$199,576) | \$70,766<br>(\$2,426-\$1,444,120) | \$51,536<br>(\$119,296) | \$22,425<br>(\$111-\$1,954,908) |
| GPA-related Total costs | \$89,761<br>(\$171,624)  | \$34,697<br>(\$354-\$1,366,646)   | \$25,531<br>(\$101,570) | \$3,413<br>(\$0-\$1,734,922)    |

**Supplemental Table 4a.** All-cause pre-diagnosis healthcare costs of patients with microscopic polyangiitis (MPA). All costs in US\$.

|                           | <b>4-6 Months Pre-Diagnosis</b> |                         | <b>3 Months Pre-Diagnosis</b> |                         |
|---------------------------|---------------------------------|-------------------------|-------------------------------|-------------------------|
|                           | <b>Mean (SD)</b>                | <b>Median (Min-Max)</b> | <b>Mean (SD)</b>              | <b>Median (Min-Max)</b> |
| Inpatient admission costs | \$5,484 (\$23,253)              | \$0 (\$0-\$275,773)     | \$9,860 (\$31,782)            | \$0 (\$0-\$398,539)     |
| ER costs                  | \$312 (\$1,404)                 | \$0 (\$0-\$18,535)      | \$582 (\$1,887)               | \$0 (\$0-\$24,476)      |

|                                |                     |                         |                     |                         |
|--------------------------------|---------------------|-------------------------|---------------------|-------------------------|
| Outpatient office visit costs  | \$337 (\$684)       | \$214 (\$0-\$14,437)    | \$496 (\$960)       | \$335 (\$0-\$15,851)    |
| Other outpatient service costs | \$4,623 (\$13,726)  | \$727 (\$0-\$162,751)   | \$5,875 (\$14,556)  | \$1,594 (\$0-\$173,575) |
| Prescription drug costs        | \$1,230 (\$1,909)   | \$582 (\$0-\$13,207)    | \$1,369 (\$2,419)   | \$643 (\$0-\$14,840)    |
| Total costs                    | \$11,985 (\$29,828) | \$2,397 (\$0-\$293,871) | \$18,181 (\$38,459) | \$5,347 (\$0-\$446,186) |

**Supplemental Table 4b.** All-cause post-diagnosis healthcare costs of patients with microscopic polyangiitis (MPA). All costs in US\$.

|                                | 3 Months Post-diagnosis |                           | 4-6 Months Post-diagnosis |                         |
|--------------------------------|-------------------------|---------------------------|---------------------------|-------------------------|
|                                | Mean (SD)               | Median (Min-Max)          | Mean (SD)                 | Median (Min-Max)        |
| Inpatient admission costs      | \$25,726 (\$72,948)     | \$0 (\$0-\$861,316)       | \$9,050 (\$43,397)        | \$0 (\$0-\$578,819)     |
| ER costs                       | \$568 (\$1,489)         | \$0 (\$0-\$12,297)        | \$450 (\$1,688)           | \$0 (\$0-\$16,734)      |
| Outpatient office visit costs  | \$719 (\$1,075)         | \$542 (\$0-\$15,834)      | \$495 (\$823)             | \$350 (\$0-\$14,557)    |
| Other outpatient service costs | \$9,589 (\$18,560)      | \$4,281 (\$0-\$262,750)   | \$7,136 (\$15,701)        | \$1,939 (\$0-\$189,377) |
| Prescription drug costs        | \$1,562 (\$2,296)       | \$818 (\$0-\$19,090)      | \$1,347 (\$2,049)         | \$609 (\$0-\$16,069)    |
| Total costs                    | \$38,165 (\$78,286)     | \$11,848 (\$81-\$880,259) | \$18,478 (\$48,032)       | \$4,727 (\$0-\$608,782) |

ER: emergency room.
